# Supplementary material for: Visualized RNA detection of SARS-CoV-2 in a closed tube by coupling RT-PCR with nested invasive reaction
Source: Royal Society of Chemistry journal article supplement (doi:10.1039/d2an01679f), 2023-01-01
Supplement: d2an01679f1.pdf [file d2an01679f1.pdf]

## Supporting Information

### Visualized RNA detection of SARS-CoV-2 in a closed-tube by coupling RT-PCR with nested invasive reaction

Jingwen Shan,<sup>‡a</sup> Tao Wu,<sup>‡b</sup> Wei Wei,<sup>a</sup> Jinling Huang,<sup>a</sup> Yijun Li,<sup>a</sup> Bingjie Zou,<sup>a,c</sup> Yi Ma,<sup>d</sup> Lunbiao Cui,<sup>\*b</sup> Haiping Wu<sup>\*a,c</sup> and Guohua Zhou<sup>\*a,c,d,e</sup>

<sup>a</sup> *Department of Clinical Pharmacy, Jinling Hospital, School of Pharmaceutical Sciences, Southern Medical University, Guangzhou, 510515, China*

<sup>b</sup> *NHC Key laboratory of Enteric Pathogenic Microbiology, Jiangsu Provincial Center for Disease Control and Prevention, Nanjing, 210009, China*

<sup>c</sup> *School of Life Science and Technology, China Pharmaceutical University, Nanjing, 210009, China*

<sup>d</sup> *State Key Laboratory of Analytical Chemistry for Life Science & Jiangsu Key Laboratory of Molecular Medicine, Medical School of Nanjing University, Nanjing, 210002, China*

<sup>e</sup> *School of Pharmacy, Nanjing Medical University, Nanjing, 211166, China*

#### Corresponding Authors

\* Guohua Zhou, E-mail: ghzhou@nju.edu.cn

\* Haiping Wu, E-mail: wuhaiping@smu.edu.cn

\* Lunbiao Cui, E-mail: lbcui@jscdc.cn

#### Author Contributions

<sup>‡</sup> Jingwen Shan and Tao Wu contributed equally to this work.

---

## Table of Contents

|           |                                                                                                                                                                                                       |          |
|-----------|-------------------------------------------------------------------------------------------------------------------------------------------------------------------------------------------------------|----------|
| Table S1  | Sequences of PCR primers                                                                                                                                                                              | Page S3  |
| Table S2  | Sequences of probes                                                                                                                                                                                   | Page S4  |
| Table S3  | Probes for self-assembling of AuNP-probes                                                                                                                                                             | Page S5  |
| Table S4  | Probes for RT-PCR coupled with invasive reaction                                                                                                                                                      | Page S6  |
| Table S5  | Compositions of buffer for each reverse transcriptase                                                                                                                                                 | Page S7  |
| Figure S1 | Characterization of AuNP-probes by UV-Vis absorbance and TEM images.                                                                                                                                  | Page S8  |
| Figure S2 | Gel electrophoresis images of PCR products using cDNAs reverse-transcribed by different reverse transcriptase at the corresponding kit-recommended buffers and the visualized closed-tube PCR buffer. | Page S9  |
| Figure S3 | Images of the visualized closed-tube RT-PCR at kit-recommended buffers for corresponding reverse transcriptase.                                                                                       | Page S10 |
| Figure S4 | Results of the visualized closed-tube RT-PCR, the agarose gel electrophoresis analysis and real-time fluorescence analysis.                                                                           | Page S11 |
| Figure S5 | Effect of the concentrations of NaCl on self-assembling of AuNP-probes in the visualized closed-tube RT-PCR.                                                                                          | Page S12 |

---

**Table S1. Sequences of PCR primers**

| Primers          | Sequence (5'-3')                                                          |
|------------------|---------------------------------------------------------------------------|
| N gene-F         | GCAGTCAAGCCTCTTCTCGTTCCTCATCACGTA                                         |
| N gene-R         | AGTTTGGCCTTGTTGTTGTTGGCCTTACCAGA                                          |
| S gene-F         | AAATGGAACCATTACAGATGCTGTAGACTGTGC                                         |
| S gene-R         | GGCGTTAAAACTTCACCAAAGGGCACAAGTT                                           |
| Orflab-F         | TACGCCAAGCTTTGTTAAAAACAGTACAATTCTG                                        |
| Orflab-R         | GGCATTAAACAATGAATAATAAGAATCTACAACAGG                                      |
| A570D-F          | TGAGTCTAACAAAAAGTTTCTGCCTTTCCAACA                                         |
| A570D-R          | TGTAATGTCAAGAATCTCAAGTGTCTGTGGATCA                                        |
| D80A-F           | CCAATGTTACTTGGTTCCTGCTATAACATGTCTC                                        |
| D80A-R           | ACTTCTCAGTGGAAGCAAATAAACACCATCA                                           |
| T547K-F          | CAGCAACTGTTTGTGGACCTAAAAAGTCTACT                                          |
| T547K-R          | GCCAAATTGTTGGAAAGGCAGAACTTTTTG                                            |
| $\beta$ -actin-F | CCCTGAACCCCAAGGCCAACCGCGAGAAGATGACC                                       |
| $\beta$ -actin-R | CATACCCCTCGTAGATGGGCACAGTGTGGGTG                                          |
| T7-A570D-F       | <u>ACTCGTTAATACGACTCACTATAGGGAG</u><br>TGAGTCTAACAAAAAGTTTCTGCCTTTCCAACA  |
| T7-D80A-F        | <u>ACTCGTTAATACGACTCACTATAGGGAG</u><br>CCAATGTTACTTGGTTCCTGCTATAACATGTCTC |
| T7-T547K-F       | <u>ACTCGTTAATACGACTCACTATAGGGAG</u><br>CAGCAACTGTTTGTGGACCTAAAAAGTCTACT   |

Note: F refers to forward primer; R refers to reverse primer; Underlined sequences are the T7 promoter.

---

**Table S2. Sequences of probes**

| Probes            | Sequence (5'-3')                   |
|-------------------|------------------------------------|
| N gene-UP         | TCTTGCTTTGCTGCTGCTTGT              |
| N gene-DP         | CGCGCCGAGG ACAGATTGAACCAGCTT       |
| S gene-UP         | TGATAGATTCTTTTTCTACAGTGAAGGATC     |
| S gene-DP         | CGCGCCGAGG TTCAACGTACACTTTGTTTC    |
| Orflab-UP         | GAAATCATACCAGTTACCATTGAGATCTTGT    |
| Orflab-DP         | CGCGCCGAGG ATTATCTAATGTCAGTACACCA  |
| A570D-UP          | CGGACAGCATCAGTAGTGTCAC             |
| A570D-DP          | CGCGCCGAGG TCAATGTCTCTGCCAAAT      |
| D80A-UP           | GGGACCAATGGTACTAAGAGGTTTGT         |
| D80A-DP           | CGCGCCGAGG CTAACCCTGTCCTACCA       |
| T547K-UP          | CTCAGTAAGAACACCTGTGCCTC            |
| T547K-DP          | CGCGCCGAGG TTAAACCATTGAAGTTGAAATTG |
| $\beta$ -actin-UP | GCCAGAGGCGTACAGGGAC                |
| $\beta$ -actin-DP | CGCGCCGAGG TAGCACAGCCTGGATA        |

Note: UP refers to upstream probe; DP refers to downstream probe.

---

**Table S3. Probes for self-assembling of AuNP-probes**

| Name      | Types         | Sequences (5'-3')    | Modification |
|-----------|---------------|----------------------|--------------|
| Hp        | Hairpin probe | GTCTTGTGGTACTGCACT   | 3'-Spacer C3 |
|           |               | CGTCTCGGTTTTCCGAGA   |              |
|           |               | CGAGTCCTCGGCGCGATC   |              |
|           |               | GTGATGAACCAT         |              |
| 3'-AuNP-1 | Nanoparticle  | GCAGTACCACAAGACAAA   | 3'-SH C6     |
|           | probe         | AAAAAAA              |              |
| 5'-AuNP-2 | Nanoparticle  | AAAAAAAAAAAAATGGTTCA | 5'-SH C6     |
|           | probe         | TCACGAT              |              |

Note: AuNPs, gold nanoparticles; Hp, hairpin probe.

---

**Table S4. Probes for RT-PCR coupled with invasive reaction**

| Probes                 | Sequence (5'-3')                                        |
|------------------------|---------------------------------------------------------|
| FAM-N<br>gene-DP       | ACGGACGCGGAG ACAGATTGAACCAGCTT                          |
| FRET-<br>hairpin probe | [T(FAM)]CT[T(BHQ1)]AGCCGGTTTTCCGGCTAAGACTC<br>CGCGTCCGT |

Note: DP refers to downstream probe.

---

**Table S5. Components of buffer used for each reverse transcriptase**

| Reverse transcriptase name (buffer)                                      | Components                                                                                                                                     |
|--------------------------------------------------------------------------|------------------------------------------------------------------------------------------------------------------------------------------------|
| Tth DNA polymerase<br>(kit-recommended buffer)                           | 250 mM bicine/KOH (pH 8.2), 575 mM K-acetate and 40% glycerol (v/v)                                                                            |
| M-MLV reverse transcriptase<br>(kit-recommended buffer)                  | 50mM Tris-HCl (pH 8.3), 75 mM KCl, 3mM MgCl <sub>2</sub> , 10mM DTT, 0.5 mM [ <sup>3</sup> H]-dTTP and 0.4mM poly A·oligo(dT) <sub>12-18</sub> |
| AMV reverse transcriptase<br>(kit-recommended buffer)                    | 250 mM Tris-HCl (pH 8.3), 250 mM KCl, 50 mM MgCl <sub>2</sub> , 2.5 mM spermidine and 50 mM DTT                                                |
| HiScript II reverse transcriptase<br>(kit-recommended buffer)            | Unavailable from the instruction                                                                                                               |
| HiScript II reverse transcriptase<br>(visualized closed-tube PCR buffer) | 10 mM Tris-HCl (pH 8.5), 7.5 mM MgCl <sub>2</sub> ·6H <sub>2</sub> O, 30 mM NaCl, 0.05% NP-40 and 0.05% Tween-20                               |

---

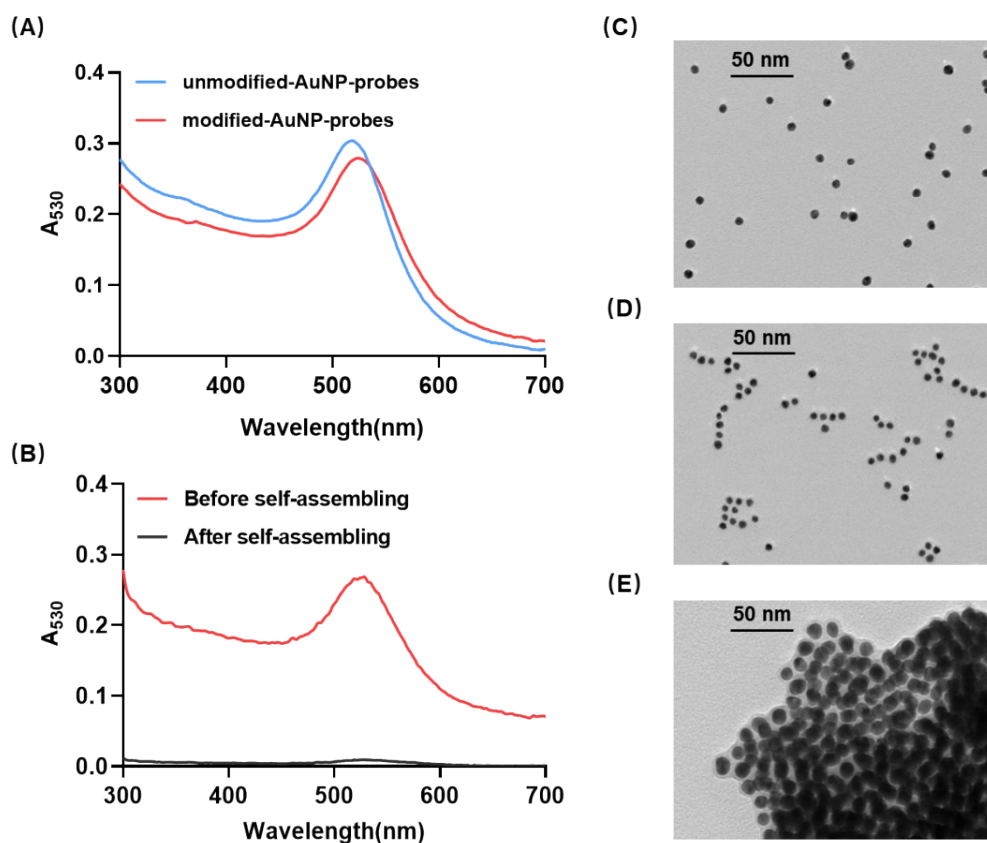

**Fig. S1** Characterization of AuNP-probes. (A) UV-Vis absorbance (300-700 nm) of unmodified AuNPs and oligonucleotide probes-modified AuNPs. (B) UV-Vis absorbance (300-700 nm) for the AuNP-probes before and after self-assembling. The TEM images of gold nanoparticles (C), the free (D) and aggregated (E) AuNP-probes. Scale bar: 50 nm.



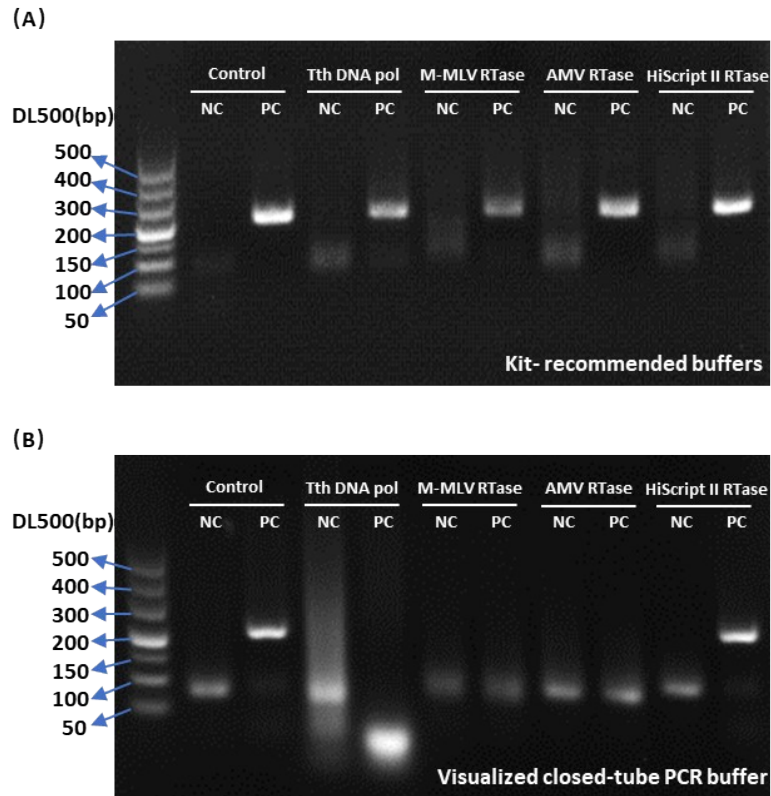

**Fig. S2** Gel electrophoresis images of PCR products using cDNAs reverse-transcribed by each of Tth DNA polymerase, M-MLV reverse transcriptase, AMV reverse transcriptase and HiScript II reverse transcriptase at the corresponding kit-recommended buffers (A) and at the proposed visualized closed-tube PCR buffer (B). PC and NC mean PCR with and without the cDNA reverse-transcribed by individual reverse transcriptase indicated in each band, respectively; while the PC in control means PCR with the cDNA reverse-transcribed by HiScript II reverse transcriptase in kit-recommended buffer. A total of  $2 \times 10^5$  copies of the N gene RNA of SARS-CoV-2 were reverse-transcribed into 20  $\mu$ L, and a 2- $\mu$ L aliquot was employed for each PCR.

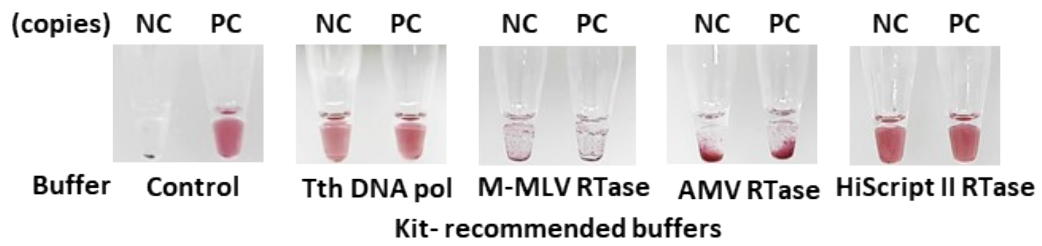

**Fig. S3** Images of the visualized closed-tube RT-PCR at kit-recommended buffers for Tth DNA polymerase, M-MLV reverse transcriptase, AMV reverse transcriptase and HiScript II reverse transcriptase, respectively; while the control group was at the proposed visualized closed-tube PCR buffer. PC and NC mean with and without the target of  $2 \times 10^4$  copies of the N gene RNA of SARS-CoV-2.

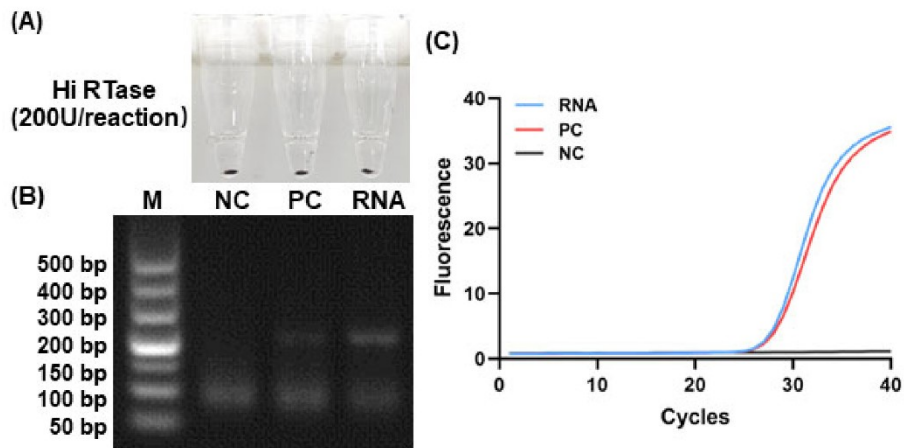

**Fig. S4** Results of the visualized closed-tube RT-PCR using the kit-recommended amount (200 U) of HiScript II reverse transcriptase per reaction. (A) Image of the tubes after the visualized closed-tube RT-PCR. (B) Image of the agarose gel electrophoresis analysis of the products from the visualized closed-tube RT-PCR. (C) Real-time fluorescence analysis of RT-PCR (using HiScript II reverse transcriptase for RT) coupled with invasive reaction based on FRET hairpin probes to report signals. RNA means the N gene RNA ( $10^4$  copies) of SARS-CoV-2. PC means the use of the DNA template ( $10^4$  copies) amplified from the cDNA of the N gene of SARS-CoV-2 for assay. NC is the control without any target.

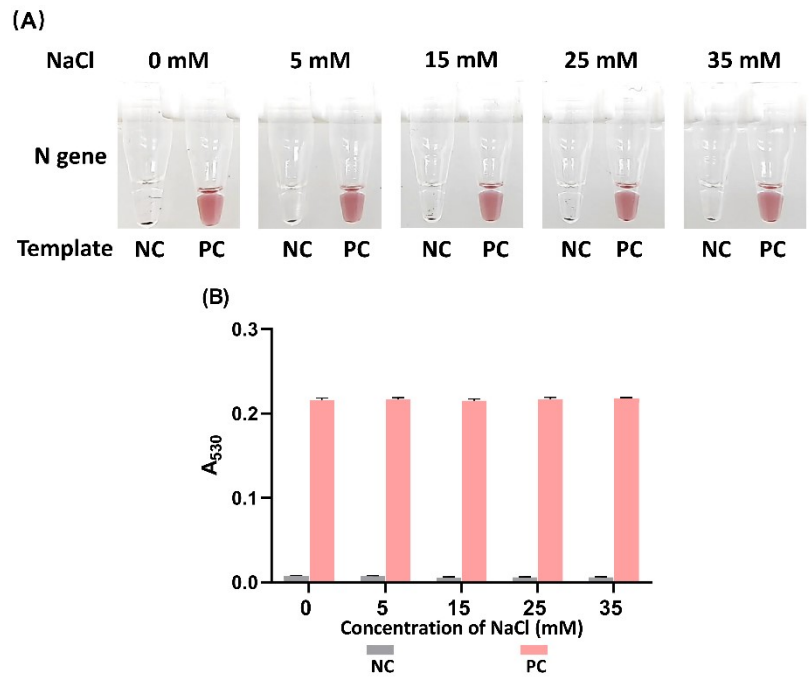

**Fig. S5** Effect of the concentrations of NaCl on self-assembling of AuNP-probes in the visualized closed-tube RT-PCR. Images (A) and  $A_{530}$  of the PC and NC by the visualized closed-tube RT-PCR at 0 mM, 5 mM, 15 mM, 25 mM and 35 mM NaCl. PC means the use of the DNA template ( $10^4$  copies) amplified from the cDNA of the N gene of SARS-CoV-2 for assay. NC is the control without any target.
